# Supplementary material for: Immunogenicity when utilizing adenovirus serotype 4 and 5 vaccines expressing circumsporozoite protein in naïve and Adenovirus (Ad5) immune mice
Source: PubMed Central journal article supplement (PMC3472263; doi:10.1186/1475-2875-11-209), 2012-06-21

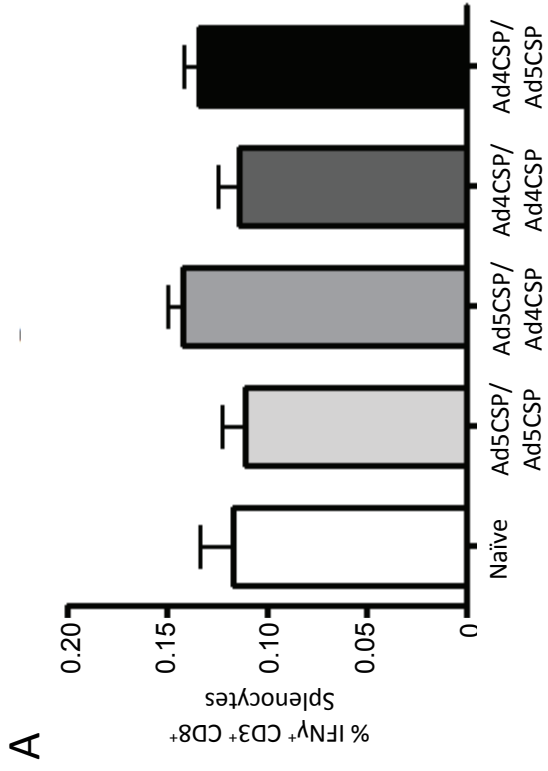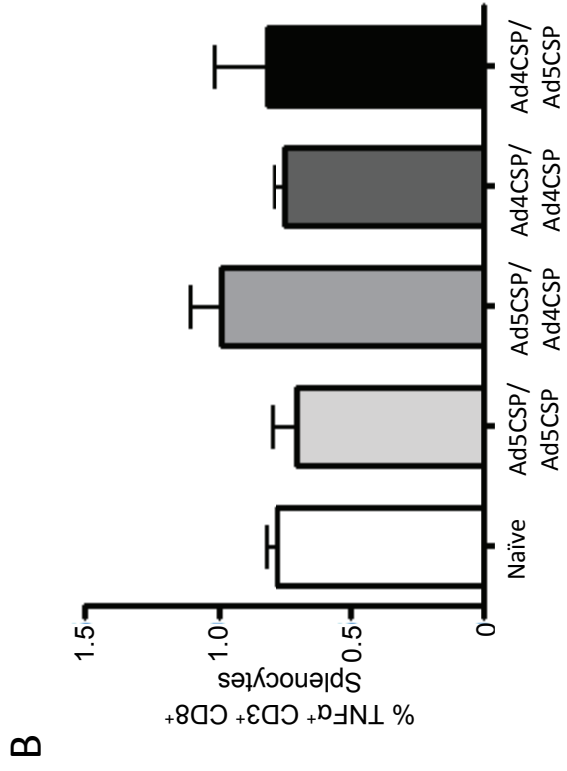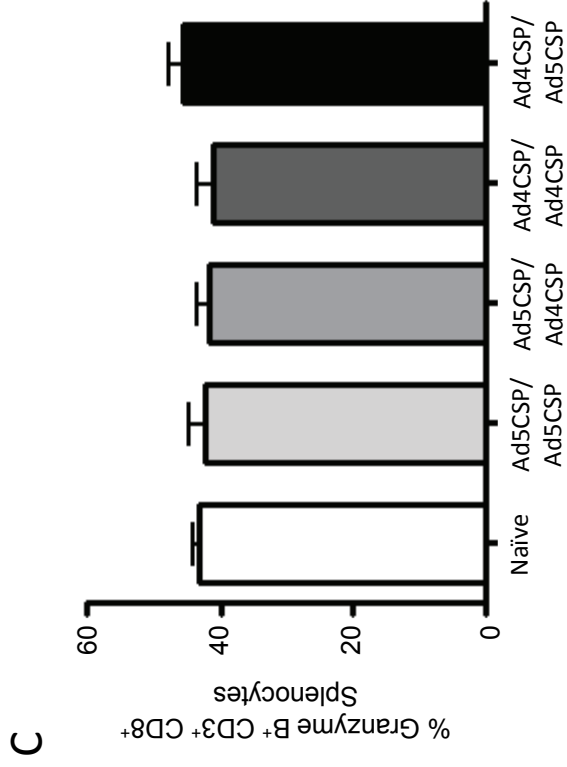

Supplement: 1475-2875-11-209-S4.pdf [file 1475-2875-11-209-S4.pdf]
